# Supplementary material
Source: PubMed Central journal article supplement (PMC2529100)
Supplement: 0804280105_0804280105SI.pdf [file 0804280105_0804280105SI.pdf]

# Supporting Information

Alder et al. 10.1073/pnas.0804280105

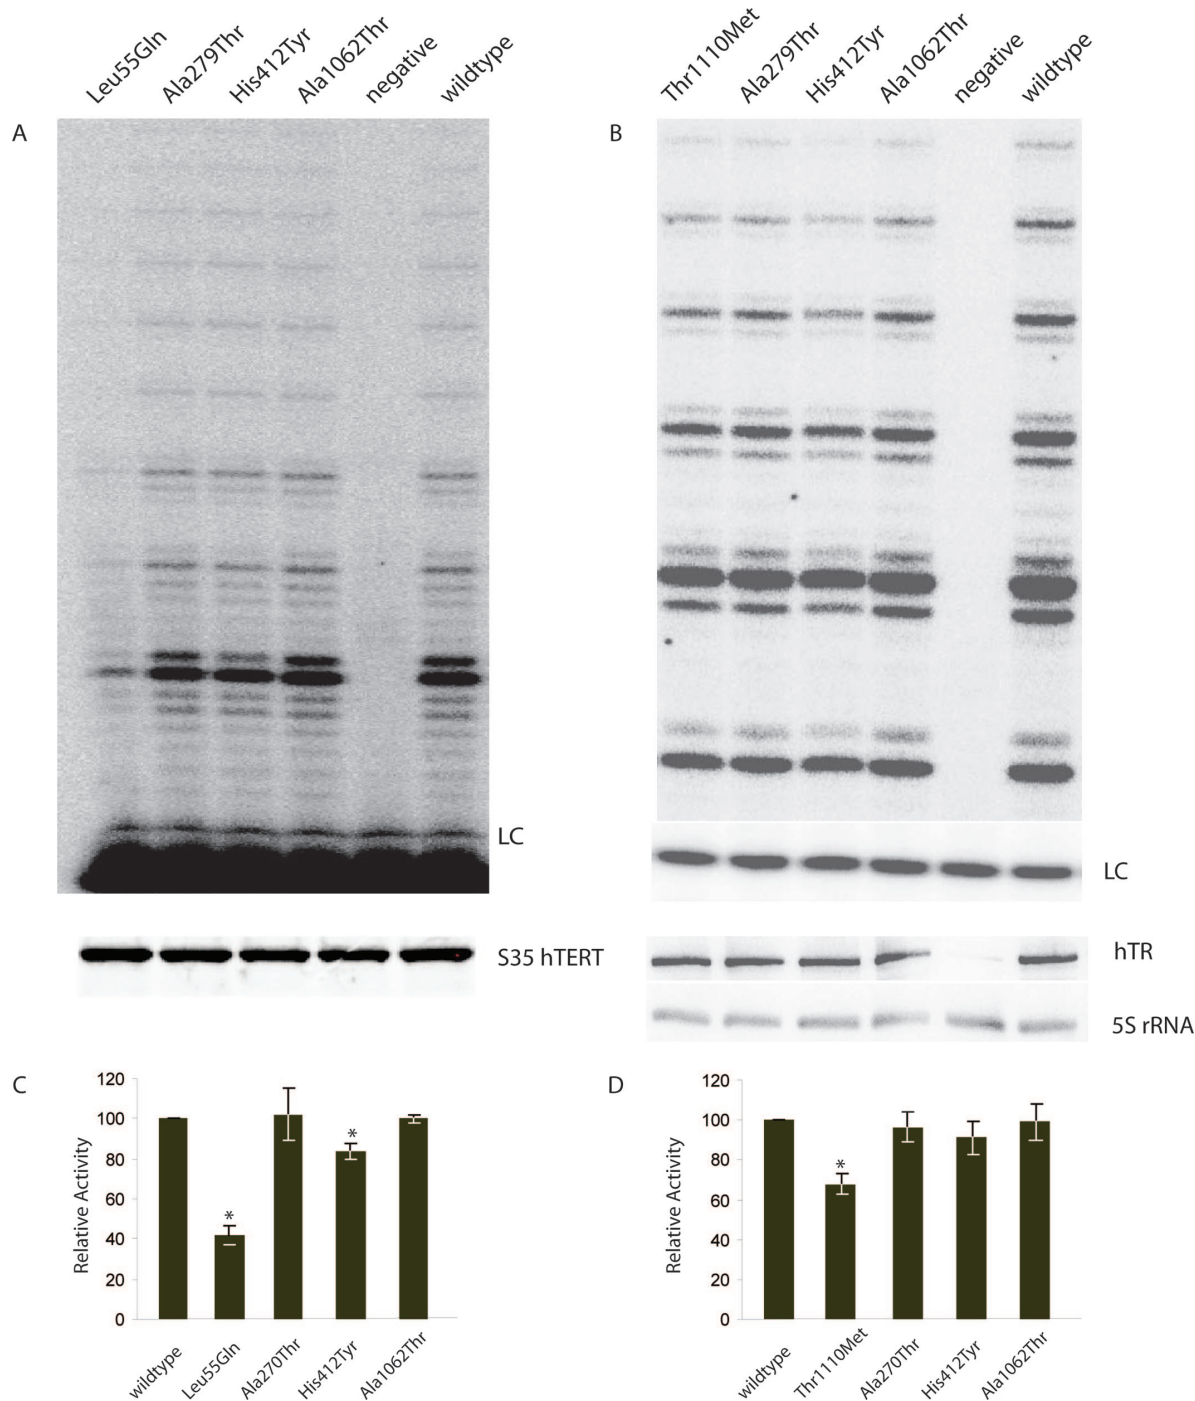

**Fig. S1.** Telomerase activity of non-synonymous hTERT variants identified in sporadic IIP patients and healthy controls. Telomerase activity of hTERT Ala279Thr and Ala1062Thr was intact showing no compromise as quantitated by the direct assay both *in vitro* (A) and after reconstitution in 293FT cells (B) ( $P = 0.892$  and  $0.990$  respectively, *in vitro*). In contrast, hTERT Leu55Gln and Thr110Met identified in IPF families show decreased activity as previously described (5). The His412Tyr allele showed a modest decrease in catalytic activity *in vitro* (mean 84% of wild type,  $P = 0.002$ , two-sample *t*-test) but not *in vivo* (mean 91% of wildtype,  $P = 0.359$ ). Quantitation of the *in vitro* assays is shown in C and of assays performed in cells in D. The His412Tyr allele did not have a 3 processivity defect. LC identifies the loading controls and \* refers to statistically significant *P*-values (all  $< 0.01$ ).

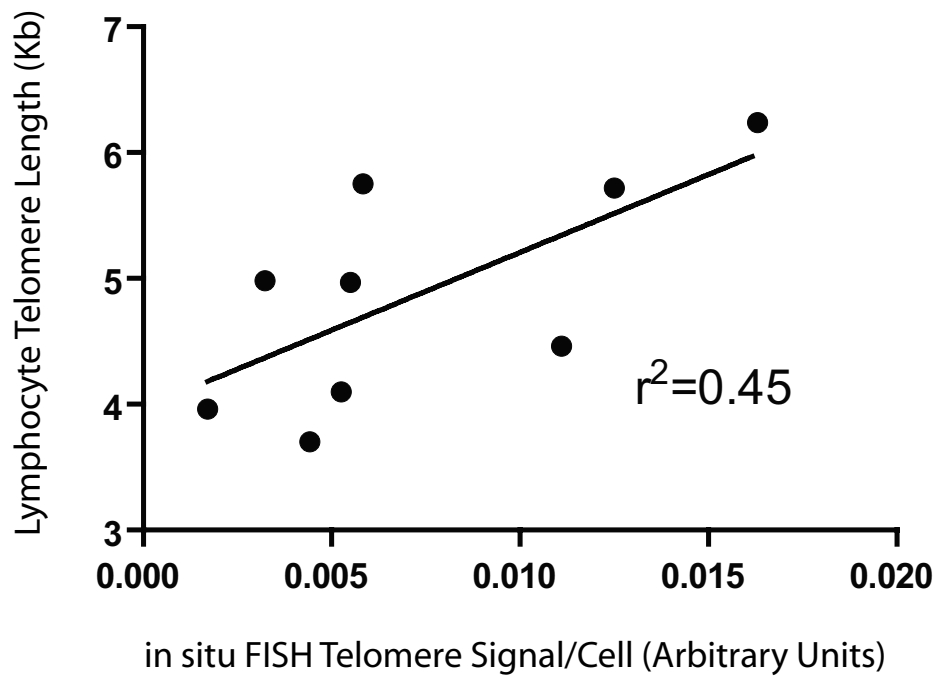

**Fig. S2.** Correlation between alveolar telomere length quantitated from archived tissues in surfactant protein C positive cells and lymphocyte telomere length as measured by flow-FISH. A positive correlation can be seen in this dataset of nine IPF patients (Pearson's correlation coefficient = 0.67,  $r^2 = 0.45$ ;  $P = 0.047$ ).

**Table S1. Patient characteristics**

|                                       | Number |
|---------------------------------------|--------|
| Total IIP                             | 100    |
| Telomere length studies               | 62     |
| Age (years)                           |        |
| Median                                | 64     |
| Range                                 | 35–80  |
| Sex                                   |        |
| Male                                  | 68     |
| Female                                | 32     |
| IPF                                   | 84     |
| IIP other than IPF                    | 16     |
| Lung biopsy                           | 60     |
| Smoking history                       |        |
| Never                                 | 28     |
| Less than 15 pack-years               | 18     |
| 15–50 pack years                      | 29     |
| $\geq 50$ pack-years                  | 13     |
| Unknown                               | 12     |
| Race                                  |        |
| Caucasian                             | 97     |
| Platelet count available ( $n = 85$ ) |        |
| Mean platelet count/mm <sup>3</sup>   | 248    |
| Platelet count < 150/mm <sup>3</sup>  | 10%    |

**Table S2. *hTERT* variants identified in sporadic IIP patients**

| Location               | Variation                            | 3' flanking sequence   | Minor allele frequency<br>(n = 200) | Previous report*  |
|------------------------|--------------------------------------|------------------------|-------------------------------------|-------------------|
| Exon 2                 | c.835 G→A (Ala279Thr) <sup>†</sup>   | CCGAAGAAGC             | 0.04                                | 0.02**            |
|                        | c.915 G→A (Ala305Ala)                | GGCCCCCAT              | 0.24                                | rs2736098         |
|                        | c.1234 C→T (His412Tyr) <sup>†</sup>  | ACTGCCCGCT             | 0.01                                | rs34094720        |
| Intron 2               | IVS2 + 39 G→C                        | CTGAATGCAG             | 0.03                                |                   |
|                        | IVS2-166 G→A                         | CCAGGCCCTT             | 0.01                                |                   |
| Intron 3               | IVS3 + 130 C→T                       | GTCACAGGCC             | 0.29                                | rs7725218         |
|                        | IVS3 + 137 G→A                       | GCCTGGTCCA             | 0.01                                | rs34301490        |
| Intron 4               | IVS4 + 10C→T                         | TTTGTTTAA              | 0.01                                | rs33948291        |
|                        | IVS4 + 15 G→A                        | TTTAACTTCC             | 0.01                                | rs35695689        |
|                        | IVS4 + 78 G→A                        | GGCCCGGAGG             | 0.01                                |                   |
|                        | IVS4 + 140 C→T                       | GCACRGTGAG             | 0.01                                |                   |
|                        | IVS4 + 145 A→G                       | GTGAGGTGGC             | 0.34                                | rs7734992         |
|                        | IVS4 + 245 C→T                       | GGGCCRRGGC             | 0.19                                | rs2242652         |
|                        | IVS4 + 309 C→G                       | CTCGTGCGC              | 0.31                                | rs10054203        |
|                        | IVS4 + 483 G→A                       | TGGCATGAGG             | 0.23                                | rs10069690        |
|                        | IVS4 + 572 G→A                       | GGTCTGGGTG             | 0.01                                | rs35247701        |
|                        | IVS4 + 646 C→T                       | GGATCCACTT             | 0.01                                | rs28428579        |
|                        | Exon 5                               | c.2031 C→T (Gly677Gly) | GCCTCTGTGC                          | 0.01              |
| c.2097 C→T (Ala699Ala) |                                      | CAGGACCCGC             | 0.02                                | rs33963617        |
| Intron 5               | IVS5 + 182 A→C                       | TGGGGCCGAC             | 0.04                                | rs35241335        |
|                        | IVS5 + 414 G→A                       | CCAGGCCAGG             | 0.01                                |                   |
| Intron 6               | IVS6-162 C→T                         | GRCCCCGTT              | 0.01                                |                   |
| Exon 7                 | c.2328 C→T (Phe776Phe)               | GTGGCTCACC             | 0.01                                |                   |
| Intron 11              | IVS11 + 65 T→C                       | GCGTCCACCT             | 0.01                                |                   |
| Intron 12              | IVS12 + 50 C→T                       | GCAAGTATGT             | 0.01                                |                   |
|                        | IVS12 + 59 TG8→TG9                   | CRCGCGTGCC             | 0.04                                |                   |
|                        | IVS12 + 75 G→A                       | CGCGTGCCCTG            | 0.04                                |                   |
| Intron13               | IVS13 + 137 C→A                      | CTGTGCACAG             | 0.02                                |                   |
|                        | IVS13-96 G→A                         | TGCACGCACA             | 0.01                                | rs35083412        |
| Exon 14                | c.3039 C→T (His1013His)              | GCATGTGTGC             | 0.11                                | rs33954691        |
|                        | c.3105 C→T (Val1035Val)              | ATCTTGACA              | 0.01                                |                   |
| Intron14               | IVS14 + 3 A→G                        | TGTGCAGGTG             | 0.01                                |                   |
| Exon 15                | c.3184 G→A (Ala1062Thr) <sup>†</sup> | CCGGCCCTST             | 0.03                                | rs35719940,0.01** |
| Intron15               | IVS15 + 111 C→T                      | CTGACCCTGG             | 0.01                                |                   |
| Exon 16                | c.3324 G→A (Pro1108Pro)              | GGGACGACGC             | 0.04                                | rs35033501        |
| 3'UTR                  | C*99 C→T                             | GCACCGCTGGG            | 0.22                                | rs2853690         |
|                        | C*154 G→C                            | GCTGAAGGCT             | 0.01                                |                   |

\* rs identifiers refer to dbSNP cluster ID; v.129.

\*\*Allele frequency in 528 controls as reported in Yamaguchi H, et al. (2005) Mutations in TERT, the gene for telomerase reverse transcriptase, in aplastic anemia. *N Engl J Med* 352:1413-1424.

†The functional significance of these nonsynonymous variants was examined in the telomerase activity assays shown in Fig. S1.
